# Supplementary material for: Establishment of a novel risk score model by comprehensively analyzing the immunogen database of bladder cancer to indicate clinical significance and predict prognosis
Source: publisher site journal article supplement (doi:10.18632/aging.103364), 2020-06-22
Supplement: Supplementary file [file aging-v12i12-103364-supplementary-material-SD1.pdf]

# SUPPLEMENTARY FIGURES

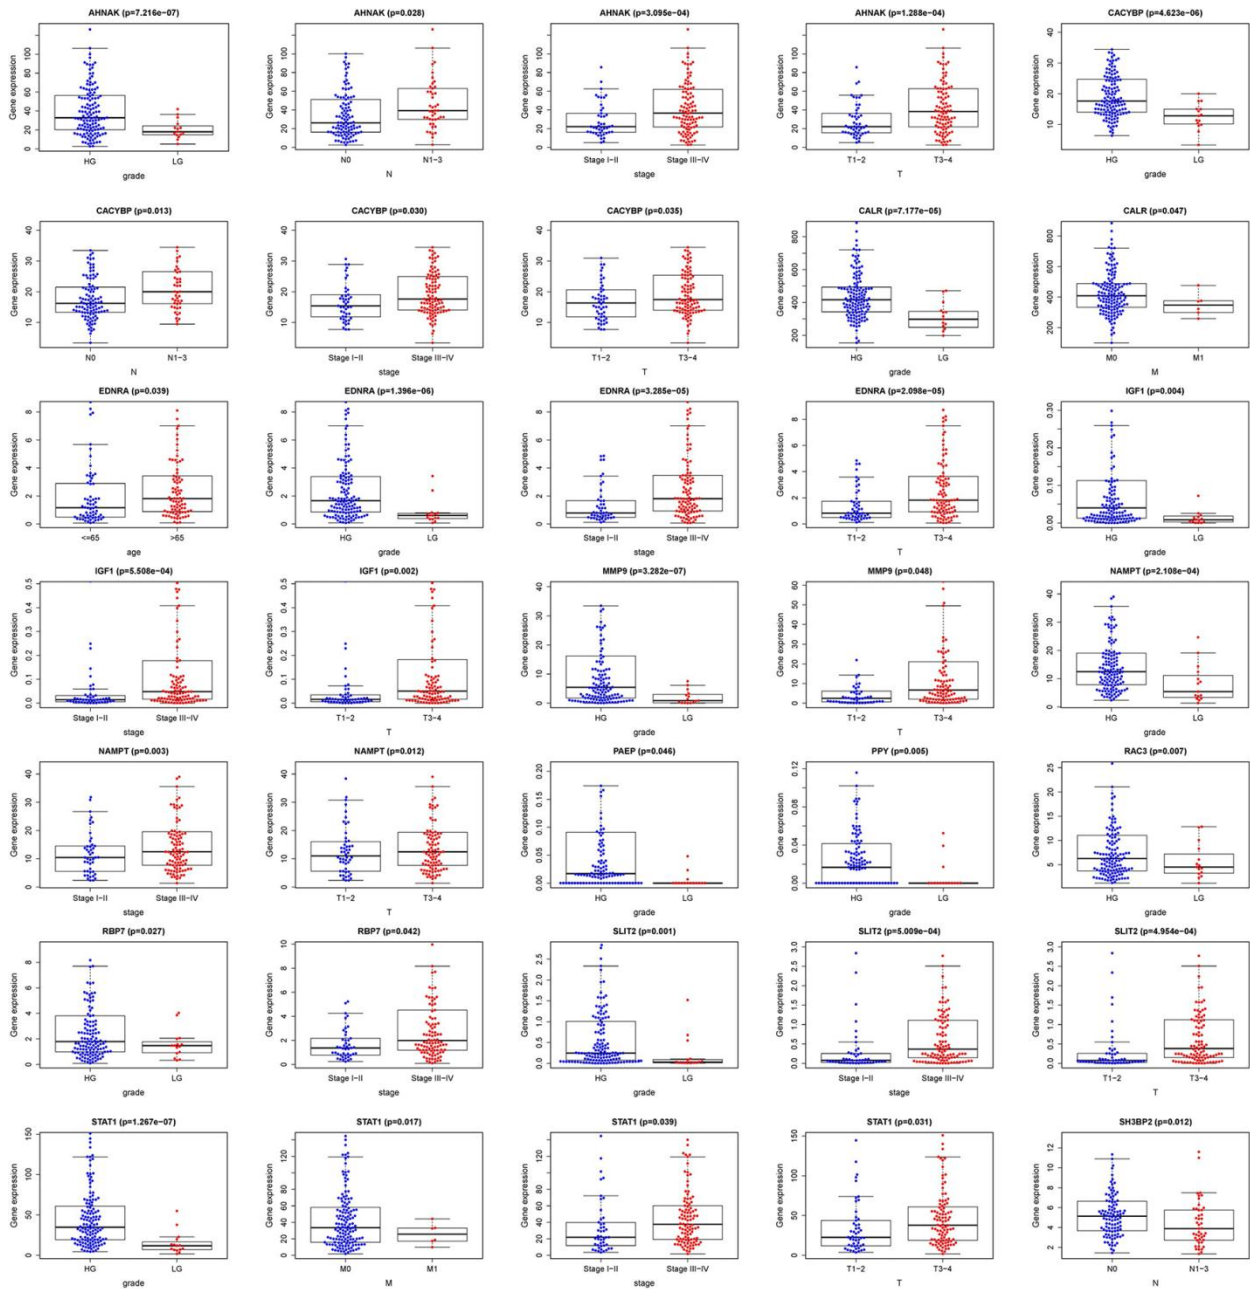

Supplementary Figure 1. The relationships between compositions of IRRS and clinicopathological and demographic characteristics

**A**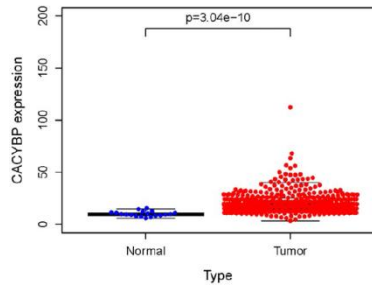**B**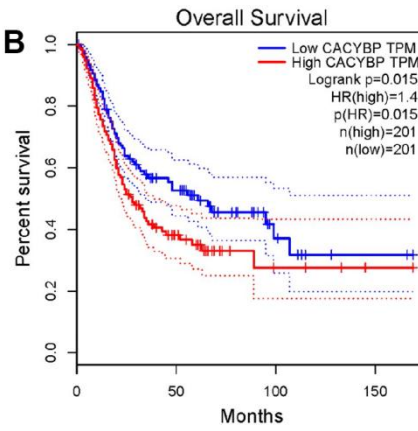**C**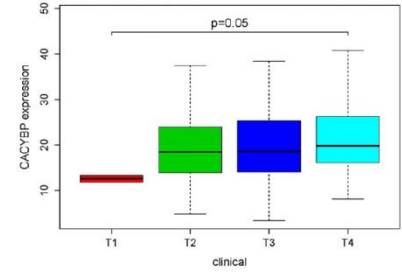

**Supplementary Figure 2. The characteristics of CACYBP.** CACYBP significantly more expressed in BCa tumor tissues (A). The higher expression levels of CACYBP were correlated with poor prognoses (B). CACYBP increasingly expressed with the more advanced T-stages (C).
